# Supplementary material for: Genetic Diversity and Sequence Polymorphism of Two Genes Encoding Theileria parva Antigens Recognized by CD8+ T Cells among Vaccinated and Unvaccinated Cattle in Malawi
Source: MDPI journal article supplement (doi:10.3390/pathogens9050334), 2020-04-30
Supplement: s1 [file s1]

## Epitope coding region

```

Allele 1 (140) 1 :TGTATTTTTCTATTAATACCAGGCCCTGACTCGAAACCAATATTCTTCAAAAACGACGGAGATAAAATTTTACGTTTCGTAGGGTATCCAAAGGTTAAAGAAGAAATGCTAGAAATGGCTACAAAATTCA
Allele 10 (11) 1 :TGTATTTTTCTATTAATACCAGGCCCTGACTCGAAACCAATATTCTTCAAAAACGACGGAGATAAAATTTTACGTTTCGTAGGGTATCCAAAGGTTAAAGAAGAAATGCTAGAAATGGCTACAAAATTCA
Allele 43 (40) 1 :TGCTATTTTTCTATTAATACCAGGCCCTGACTCGAAACCTATATTCTTCAAAAACGACGGAGATAAAATTTTACGTTTCGTAGGGTATCCAAAGGTTAAAGAAGAAATGCTAGAAATGGCTACAAAATTCA
Allele 44 (22) 1 :TGTATTTTTCTATTAATACCAGGCCCTGACTCGAAACCAATATTCTTCAAAAACGACGGAGATAAAATTTTACGTTTCGTAGGGTATCCAAAGGTTAAAGAAGAAATGCTAGAAATGGCTACAAAATTCA
Allele 45 (7) 1 :TGCTATTTTTCTATTAATACCAGGCCCTGACTCGAAACCTATATTCTTCAAAAACGACGGAGATAAAATTTTACGTTTCGTAGGGTATCCAAAGGTTAAAGAAGAAATGCTAGAAATGGCTACAAAATTCA
Allele 46 (5) 1 :TGTATTTTTCTATTAATACCAGGCCCTGACTCGAAACCAATATTCTTCAAAAACGACGGAGATAAAATTTTACGTTTCGTAGGGTATCCAAAGGTTAAAGAAGAAATGCTAGAAATGGCTACAAAATTCA
    ** *****

Allele 1 (140) 131 :ATAGACTACCAAAGGGCGTGGAATACCTGCACCTCCAGGAGTAAAACAGAGGCTCCACACCTACACCAACGACAATAACTCCTTCTGTACCTCCTACTATACCAACGCCAATAACTCCTTCTGCACC
Allele 10 (11) 131 :ATAGACTACCAAAGGGCGTGGAATACCTGCACCTCCAGGAGTAAAACAGAGGCTCCACACCTACACCAACGACAATAACTCCTTCTGTACCTCCTACTATACCAACGCCAATAACTCCTTCTGCACC
Allele 43 (40) 131 :ATAGACTACCAAAGGGCATGGAATACCTGCACCTCCAGGAGTAAAACAGAGGCTCCACACCTACACCAACGACAATAACTCCTTCTGTACCTCCTACTATACCAACTCCAATAACTCCTTCTGCACC
Allele 44 (22) 131 :ATAGACTACCAAAGGGCATGGAATACCTGCACCTCCAGGAGTAAAACAGAGGCTCCACACCTACACCAACGACAATAACTCCTTCTGTACCTCCTACTATACCAACGCCAATAACTCCTTCTGCACC
Allele 45 (7) 131 :ATAGACTACCAAAGGGCATGGAATACCTGCACCTCCAGGAGTAAAACAGAGGCTCCACACCTACACCAACGACAATAACTCCTTCTGTACCTCCTACTATACCAACGCCAATAACTCCTTCTGCACC
Allele 46 (5) 131 :ATAGACTACCAAAGGGCGTGGAATACCTGCACCTCCAGGAGTAAAACAGAGGCTCCACACCTACACCAACGACAATAACTCCTTCTGTACCTCCTACTATACCAACGCCAATAACTCCTTCTGCACC
    *****

Allele 1 (140) 261 :TCCT-----ACTACACCACCTACGGGACTAAATTTTAACTTGACAGTTTTCAGAACAAATTCATGATAGGTTTCGCAAGAAGTTAAGTTAAATATAACTCACGAATACGAGGGTGTATAC
Allele 10 (11) 261 :TCCT-----ACTACACCACCTACGGGACTAAATTTTAACTTGACAGTTTTCAGAACAAATTCATGATAGGTTTCGCAAGAAGTTAAGTTAAATATAACTCACGAATACGATGGTGTATAC
Allele 43 (40) 261 :TCCTTCTGCACCTCCTACTACACCACCTAAGGGACTAAATTTTAACTTGACACTTCAGAACAAATTCATGATAGGTTTCGCAAGAAGTTAAGTTAAGTATAACTTACGAATACGATGGTGAATAC
Allele 44 (22) 261 :TCCT-----ACTACACCACCTACGGGACTAAATTTTAACTTGACAGTTTTCAGAACAAATTCATGATAGGTTTCGCAAGAAGTTAAGTTAAATATAACTCACGAATACGAGGGTGTATAC
Allele 45 (7) 261 :TCCTTCTGCACCTCCTACTACACCACCTACGGGACTAAATTTTAACTTGACACTTCAGAACAAATTCATGATAGGTTTCGCAAGAAGTTAAGTTAAGTATAACTTACGAATACGATGGTGAATAC
Allele 46 (5) 261 :TCCT-----ACTACACCACCTACGGGACTAAATTTTAACTTGACAGTTTTCAGAACAAATTCATGATAGGTTTCGCAAGAAGTTAAGTTAAATATAACTCACGAATACGAGGGTGTATAC
    ****

```

deletions

**Supplementary Figure 1:** Multiple sequence alignment of Tp1 alleles obtained in this study from cattle from Malawi. The naming of the alleles follows the nomenclature by [27]. Alleles 1 and 5 were first described by [27]. The epitope coding region are boxed in red. The number in parenthesis is the number of sequences obtained in the allele.



1<sup>٤</sup> 2<sup>٤</sup>

```

Allele 1 (118) 1 :TAC TT TATTATTACATTTTACATTTCCCCAGTGTCTGGGAGGTAATTGTAGTCATGAAGAACTAAAAAAATTTGGGAATGCTAGAGGCGATGGTTTCGACAGGGGATGCATTGTTCAATCA
Allele 2 (22) 1 :TAC TT TATTATTATTACATTTTACATTTCCCCAGTGTCTGGGAGGTAATTGTAGTCATGAAGAACTAAAAAAATTTGGGAATGCTAGAGGCGATGGTTTCGACAGGGGATGCATTGTTCAATCA
Allele 3 (3) 1 :TAC TT TATTATTATTATTACATTTTACATTTCCCTCAGTCTTGGGAGGTAATTGTAGTCATGAAGAACTAAAAAAATTTGGGAATGCTAGAGGCGATGGTTTCGACAGGGGATGCATTGTTCAATCA
Allele 64 (24) 1 :TAC TT TATTATTATTATTACATTTTACATTTCCCCAGTGTCTGGGAGGTAATTGTAGTCATGAAGAACTAAAAAAATTTGGGAATGCTAGAGGCGATGGTTTCGACAGGGGATGCATTGTTCAATCA
Allele 65 (5) 1 :TAC TT TATTATTATTATTATTACATTTTACATTTCCCTCAGTCTTGGGAGGTAATTGTAGTCATGAAGAACTAAAAAAATTTGGGAATGCTAGAGGCGATGGTTTCGACAGGGGATGCATTGTTCAATCA
Allele 66 (3) 1 :TCCTTTATTATTATTATTATTATTACATTTTCCCCAGTGTCTGGTATGGTGAATTTAGTCATGAAGAACTAAAAAAATTTGGGAATGCTAGAGGCGATGGTTTCGACAGGGGATGCATTGTTCAATCA
Allele 67 (3) 1 :TAC TT TATTATTATTATTATTATTACATTTTCCCCAGTGTCTGGGAGGTAATTGTAGTCATGAAGAACTAAAAAAATTTGGGAATGCTAGAGGCGATGGTTTCGACAGGGGATGCATTGTTCAATCA
Allele 68 (2) 1 :TAC TT TATTATTATTATTATTATTACATTTTCCCCAGTGTCTGGGAGGTAATTGTAGTCATGAAGAACTAAAAAAATTTGGGAATGCTAGAGGCGATGGTTTCGACAGGGGATGCATTGTTCAATCA
Allele 69 (2) 1 :TAC TT TATTATTATTATTATTATTACATTTTCCCCAGTGTCTGGGAGGTAATTGTAGTCATGAAGAACTAAAAAAATTTGGGAATGCTAGAGGCGATGGTTTCGACAGGGGATGCATTGTTCAATCA
Allele 70 (2) 1 :TAC TT TATTATTATTATTATTATTACATTTTCCCCAGTGTCTGGGAGGTAATTGTAGTCATGAAGAACTAAAAAAATTTGGGAATGCTAGAGGCGATGGTTTCGACAGGGGATGCATTGTTCAATCA
Allele 71 (2) 1 :TAC TT TATTATTATTATTATTATTACATTTTCCCCAGTGTCTGGGAGGTAATTGTAGTCATGAAGAACTAAAAAAATTTGGGAATGCTAGAGGCGATGGTTTCGACAGGGGATGCATTGTTCAATCA
Allele 72 (2) 1 :TAC TT TATTATTATTATTATTATTACATTTTCCCCAGTGTCTGGGAGGTAATTGTAGTCATGAAGAACTAAAAAAATTTGGGAATGCTAGAGGCGATGGTTTCGACAGGGGATGCATTGTTCAATCA
Allele 73 (2) 1 :TAC TT TATTATTATTATTATTATTACATTTTCCCCAGTGTCTGGGAGGTAATTGTAGTCATGAAGAACTAAAAAAATTTGGGAATGCTAGAGGCGATGGTTTCGACAGGGGATGCATTGTTCAATCA
*****
3٤
Allele 1 (118) 121 :FCACATGGTATGGGAAAGGTAGGAAAAAGSTATGGTCTTAAAACTACTCCAAAAGTAGATAAAGTCTTAGCAGATCTTGAAACACTGTTTGGAAAAACACGGTCTTGGTGGTATTAGTAAA
Allele 2 (22) 121 :FCACATGGTATGGGAAAGGTAGGAAAAAGSTATGGTCTTAAAACTACTCCAAAAGTAGATAAAGTCTTAGCAGATCTTGAAACACTGTTTGGAAAAACACGGTCTTGGTGGTATTAGTAAA
Allele 3 (3) 121 :FCACATGGTATGGGAAAGGTAGGAAAAAGSTATGGTATTAGAACTCTCCAAAAGTAGATAAAGTCTTAGCAGATCTTGAAACACTGTTTGGAAAAACACGGTCTTGGTGGTATTAGTAAA
Allele 64 (24) 121 :FCACATGGTATGGGAAAGGTAGGAAAAAGSTATGGTCTTAAAACTACTCCAAAAGTAGATAAAGTCTTAGCAGATCTTGAAACACTGTTTGGAAAAACACGGTCTTGGTGGTATTAGTAAA
Allele 65 (5) 121 :FCACATGGTATGGGAAAGGTAGGAAAAAGSTATGGTATTAGAACTACTCCAAAAGTAGATAAAGTCTTAGCAGATCTTGAAACACTGTTTGGAAAAACACGGTCTTGGTGGTATTAGTAAA
Allele 66 (3) 121 :FCACATGGTATGGGAAAGGTAGGAAAAAGSTATGGTCTTAAAACTACTCCAAAAGTAGATAAAGTCTTAGCAGATCTTGAAACACTGTTTGGAAAAACACGGTCTTGGTGGTATTAGTAAA
Allele 67 (3) 121 :FCACATGGTATGGGAAAGGTAGGAAAAAGSTATGGTCTTAAAACTACTCCAAAAGTAGATAAAGTCTTAGCAGATCTTGAAACACTGTTTGGAAAAACACGGTCTTGGTGGTATTAGTAAA
Allele 68 (2) 121 :FCACATGGTATGGGAAAGGTAGGAAAAAGSTATGGTATTAGAACTACTCCAAAAGTAGATAAAGTCTTAGCAGATCTTGAAACACTGTTTGGAAAAACACGGTCTTGGTGGTATTAGTAAA
Allele 69 (2) 121 :FCACATGGTATGGGAAAGGTAGGAAAAAGSTATGGTATTAGAACTACTCCAAAAGTAGATAAAGTCTTAGCAGATCTTGAAACACTGTTTGGAAAAACACGGTCTTGGTGGTATTAGTAAA
Allele 70 (2) 121 :FCACATGGTATGGGAAAGGTAGGAAAAAGSTATGGTCTTAAAACTACTCCAAAAGTAGATAAAGTCTTAGCAGATCTTGAAACACTGTTTGGAAAAACACGGTCTTGGTGGTATTAGTAAA
Allele 71 (2) 121 :FCACATGGTATGGGAAAGGTAGGAAAAAGSTATGGTCTTAAAACTACTCCAAAAGTAGATAAAGTCTTAGCAGATCTTGAAACACTGTTTGGAAAAACACGGTCTTGGTGGTATTAGTAAA
Allele 72 (2) 121 :FCACATGGTATGGGAAAGGTAGGAAAAAGSTATGGTCTTAAAACTACTCCAAAAGTAGATAAAGTCTTAGCAGATCTTGAAACACTGTTTGGAAAAACACGGTCTTGGTGGTATTAGTAAA
Allele 73 (2) 121 :FCACATGGTATGGGAAAGGTAGGAAAAAGSTATGGTCTTAAAACTACTCCAAAAGTAGATAAAGTCTTAGCAGATCTTGAAACACTGTTTGGAAAAACACGGTCTTGGTGGTATTAGTAAA
*****
4٤ 5٤
Allele 1 (118) 241 :GATTGCTTAAATTTTTCGCAAAAGCCTAGTGTGCGTATTAATGAATGTAGAGGAGCATGTCTCAAAGGACCATTGTACTGACGACTGCCAAAATTGCTTTGATAGAACTGTAAATCT
Allele 2 (22) 241 :GATTGCTTAAATTTTTCGCAAAAGCCTAGTGTGCGTATTAATGAATGTAGAGGAGCATGTCTCAAAGGACCATTGTACTGACGACTGCCAAAATTGCTTTGATAGAACTGTAAATCT
Allele 3 (3) 241 :AAGTGCTCGAATTTTTCGCAAAAGCCTAGTGTGCGTATTAATGAATGTAGAGGAGCATGTCTCAAAGGACCATTGTACTGACGACTGCCAAAATTGCTTTGATAGAACTGTAAATCT
Allele 64 (24) 241 :GATTGCTTAAATTTTTCGCAAAAGCCTAGTGTGCGTATTAATGAATGTAGAGGAGCATGTCTCAAAGGACCATTGTACTGACGACTGCCAAAATTGCTTTGATAGAACTGTAAATCT
Allele 65 (5) 241 :AAGTGCTCGAATTTTTCGCAAAAGCCTAGTGTGCGTATTAATGAATGTAGAGGAGCATGTCTCAAAGGACCATTGTACTGACGACTGCCAAAATTGCTTTGATAGAACTGTAAATCT
Allele 66 (3) 241 :GATTGCTTAAATTTTTCGCAAAAGCCTAGTGTGCGTATTAATGAATGTAGAGGAGCATGTCTCAAAGGACCATTGTACTGACGACTGCCAAAATTGCTTTGATAGAACTGTAAATCT
Allele 67 (3) 241 :GATTGCTTAAATTTTTCGCAAAAGCCTAGTGTGCGTATTAATGAATGTAGAGGAGCATGTCTCAAAGGACCATTGTACTGACGACTGCCAAAATTGCTTTGATAGAACTGTAAATCT
Allele 68 (2) 241 :GATTGCTTAAATTTTTCGCAAAAGCCTAGTGTGCGTATTAATGAATGTAGAGGAGCATGTCTCAAAGGACCATTGTACTGACGACTGCCAAAATTGCTTTGATAGAACTGTAAATCT
Allele 69 (2) 241 :GATTGCTTAAATTTTTCGCAAAAGCCTAGTGTGCGTATTAATGAATGTAGAGGAGCATGTCTCAAAGGACCATTGTACTGACGACTGCCAAAATTGCTTTGATAGAACTGTAAATCT
Allele 70 (2) 241 :GATTGCTTAAATTTTTCGCAAAAGCCTAGTGTGCGTATTAATGAATGTAGAGGAGCATGTCTCAAAGGACCATTGTACTGACGACTGCCAAAATTGCTTTGATAGAACTGTAAATCT
Allele 71 (2) 241 :GATTGCTTAAATTTTTCGCAAAAGCCTAGTGTGCGTATTAATGAATGTAGAGGAGCATGTCTCAAAGGACCATTGTACTGACGACTGCCAAAATTGCTTTGATAGAACTGTAAATCT
Allele 72 (2) 241 :GATTGCTTAAATTTTTCGCAAAAGCCTAGTGTGCGTATTAATGAATGTAGAGGAGCATGTCTCAAAGGACCATTGTACTGACGACTGCCAAAATTGCTTTGATAGAACTGTAAATCT
Allele 73 (2) 241 :GATTGCTTAAATTTTTCGCAAAAGCCTAGTGTGCGTATTAATGAATGTAGAGGAGCATGTCTCAAAGGACCATTGTACTGACGACTGCCAAAATTGCTTTGATAGAACTGTAAATCT
*****
6٤
Allele 1 (118) 361 :GCATTGCTGGAATGCATTGSGAAAAACAAGTATTCCAAATCCATGTAATGGGAAGAAGATTATCTAAAAATACAAATTTCTGAAACAGATGAGGACGAATCTACGA
Allele 2 (22) 361 :GCATTGCTGGAATGCATTGSGAAAAACAAGTATTCCAAATCCATGTAATGGGAAGAAGATTATCTAAAAATACAAATTTCTGAAACAGATGAGGACGAATCTACGA
Allele 3 (3) 361 :GGATTGCTGGAATGATTGSGAAACCCAGTGTTCCAAACCCCTTGATTGGGAAGATGCTTATCTAAATTCAACTTCTGAAACAGATGAGGACGAATCTACGA
Allele 64 (24) 361 :GCATTGCTGGAATGCATTGSGAAAAACAAGTATTCCAAATCCATGTAATGGGAAGAAGATTATCTAAAAATACAAATTTCTGAAACAGATGAGGACGAATCTACGA
Allele 65 (5) 361 :GGATTGCTGGAATGATTGSGAAACCCAGTGTTCCAAACCCCTTGATTGGGAAGATGCTTATCTAAATTCAACTTCTGAAACAGATGAGGACGAATCTACGA
Allele 66 (3) 361 :GCATTGCTGGAATGCATTGSGAAAAACAAGTATTCCAAATCCATGTAATGGGAAGAAGATTATCTAAAAATACAAATTTCTGAAACAGATGAGGACGAATCTACGA
Allele 67 (3) 361 :GCATTGCTGGAATGCATTGSGAAAAACAAGTATTCCAAATCCATGTAATGGGAAGAAGATTATCTAAAAATACAAATTTCTGAAACAGATGAGGACGAATCTACGA
Allele 68 (2) 361 :GCATTGCTGGAATGCATTGSGAAAAACAAGTATTCCAAATCCATGTAATGGGAAGAAGATTATCTAAAAATACAAATTTCTGAAACAGATGAGGACGAATCTACGA
Allele 69 (2) 361 :GCATTGCTGGAATGCATTGSGAAAAACAAGTATTCCAAATCCATGTAATGGGAAGAAGATTATCTAAAAATACAAATTTCTGAAACAGATGAGGACGAATCTACGA
Allele 70 (2) 361 :GCATTGCTGGAATGCATTGSGAAAAACAAGTATTCCAAATCCATGTAATGGGAAGAAGATTATCTAAAAATACAAATTTCTGAAACAGATGAGGACGAATCTACGA
Allele 71 (2) 361 :GCATTGCTGGAATGCATTGSGAAAAACAAGTATTCCAAATCCATGTAATGGGAAGAAGATTATCTAAAAATACAAATTTCTGAAACAGATGAGGACGAATCTACGA
Allele 72 (2) 361 :GCATTGCTGGAATGCATTGSGAAAAACAAGTATTCCAAATCCATGTAATGGGAAGAAGATTATCTAAAAATACAAATTTCTGAAACAGATGAGGACGAATCTACGA
Allele 73 (2) 361 :GCATTGCTGGAATGCATTGSGAAAAACAAGTATTCTCAATCCATGTAATGGGAAGAAGATTATCTAAAAATACAAATTTCTGAAACAGATGAGGACGAATCTACGA
*****

```

**Supplementary Figure 2:** Multiple sequence alignment of Tp2 alleles obtained in this study from cattle from Malawi. The naming of the alleles follows the nomenclature by [27]. Alleles 1 and 2 and 3 were first described by [27]. The epitope coding region are boxed in red. The number in parenthesis is the number of sequences obtained in the allele.

**Supplementary Table 1:** Tpl Analysis of molecular variation (AMOVA)

| Source of variation             | d.f | Sum of squares | Variance components |    | Percentage of variation |
|---------------------------------|-----|----------------|---------------------|----|-------------------------|
| Among groups                    | 1   | 49.554         | 4.13637             | Va | 43.03                   |
| Among populations within groups | 2   | 93.706         | 0.62209             | Vb | 6.47                    |
| Within populations              | 224 | 1087.612       | 4.85541             | Vc | 50.50                   |
| Totals                          | 227 | 1230.873       | 9.61387             |    |                         |
| Fixed indices                   |     |                |                     |    |                         |
| FSC: 0.11357                    |     |                |                     |    |                         |
| FST: 0.49496                    |     |                |                     |    |                         |
| FCT: 0.43025                    |     |                |                     |    |                         |

**Supplementary Table 2:** Tp2Analysis of molecular variation (AMOVA)

| Source of variation             | d.f | Sum of squares | Variance components |    | Percentage of variation |
|---------------------------------|-----|----------------|---------------------|----|-------------------------|
| Among groups                    | 1   | 39.384         | 1.90318             | Va | 20.06                   |
| Among populations within groups | 2   | 40.925         | 0.26387             | Vb | 2.78                    |
| Within populations              | 183 | 1339.381       | 7.31902             | Vc | 77.16                   |
| <b>Totals</b>                   | 186 | 1419.690       | 9.48607             |    |                         |
| Fixed indices                   |     |                |                     |    |                         |
| <b>FSC: 0.03480</b>             |     |                |                     |    |                         |
| <b>FST: 0.22845</b>             |     |                |                     |    |                         |
| <b>FCT: 0.20063</b>             |     |                |                     |    |                         |
